# Supplementary material
Source: PubMed Central journal article supplement (PMC153015)

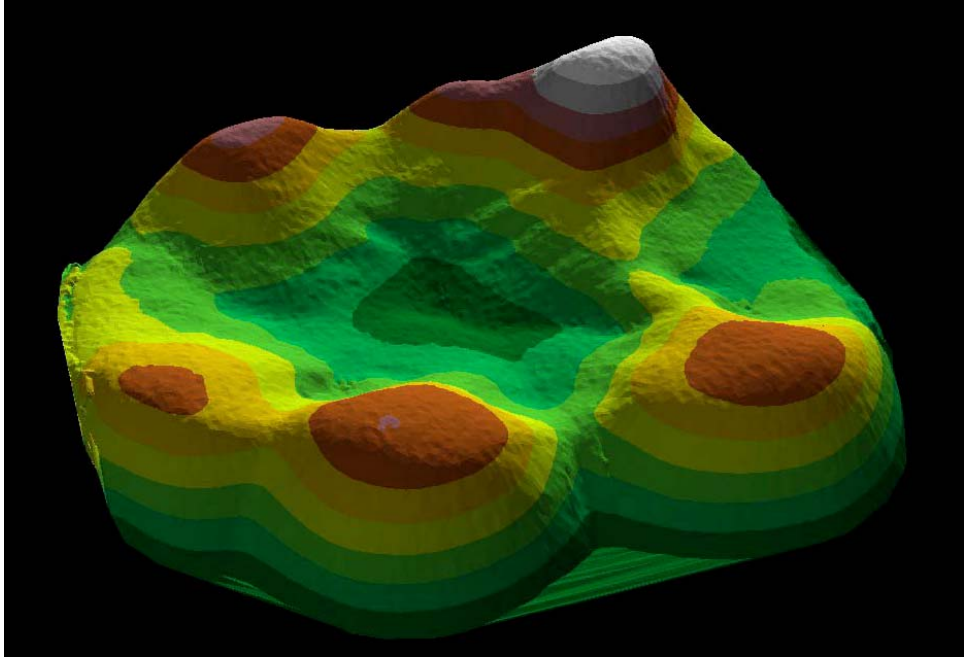

Supplement: pnas_0637016100_2.pdf [file pnas_0637016100_2.pdf]

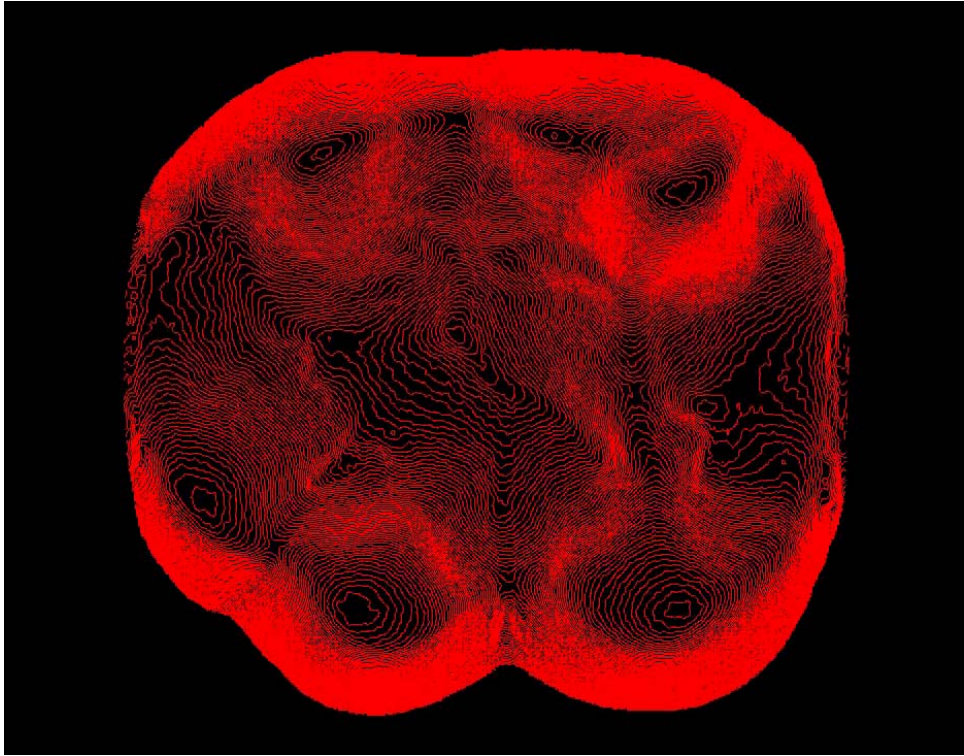

Supplement: pnas_0637016100_4.pdf [file pnas_0637016100_4.pdf]

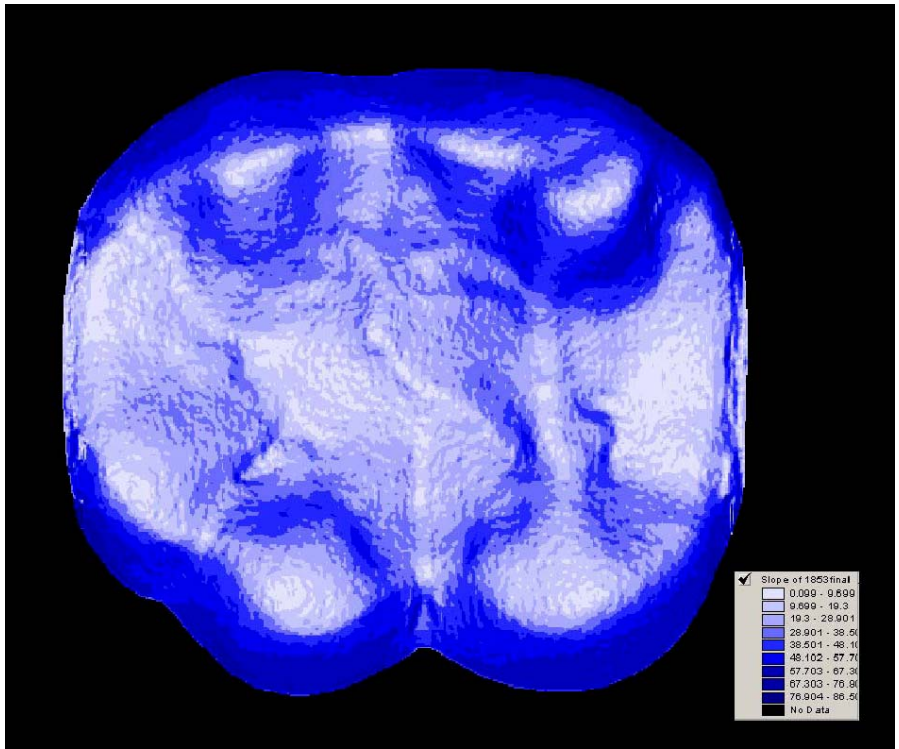

Supplement: pnas_0637016100_6.pdf [file pnas_0637016100_6.pdf]

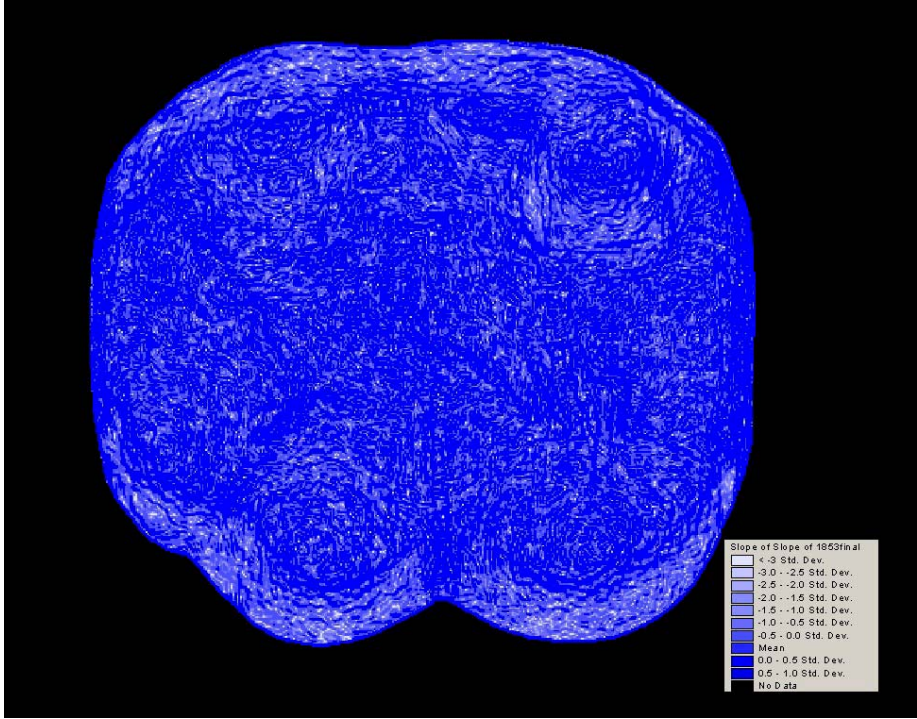

Supplement: pnas_0637016100_8.pdf [file pnas_0637016100_8.pdf]
